# Supplementary material
Source: PubMed Central journal article supplement (PMC3567820)
Supplement: cr2012150x1.pdf [file cr2012150x1.pdf]

Supplementary information, Figure S1

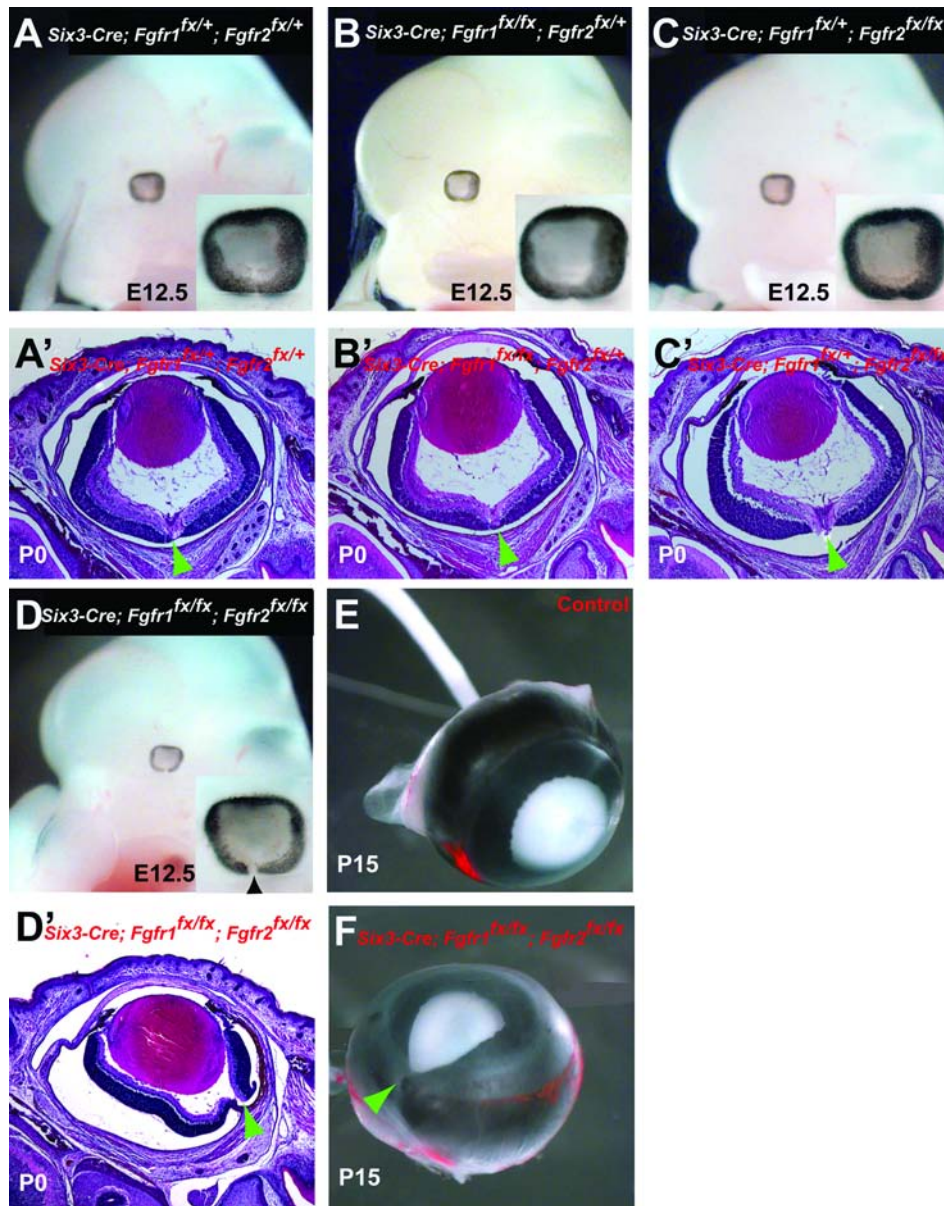

**Figure S1** *Fgfr1* and *Fgfr2* single conditional mutant eyes develop normally. (A-D) E12.5 Embryonic heads of different genotypes show that simultaneous inactivation of two alleles of both *Fgfr1* and *Fgfr2* genes (D) results in the OF closure defect. However, genotypes of all other combinations (A-C) show no obvious defect in the eye including the OF closure. (A'-D') Hematoxylin and eosin (HE) stained sections of P0 newborn eyes of different genotypes show that simultaneous inactivation of two alleles of both *Fgfr1* and *Fgfr2* genes causes the absence of the optic disc and optic nerve and presence of the open fissure (arrowhead, D'). However, the OCs of all other genotypes still have the normal optic disc and optic nerve (arrowheads, A'-C'). (E, F) The *Fgfr-DCK* P15 eyeball lacks the optic nerve, which is present in the control (E), whereas it has the unclosed fissure (arrowhead, F).
