# Supplementary material
Source: PubMed Central journal article supplement (PMC3567820)
Supplement: cr2012150x2.pdf [file cr2012150x2.pdf]

Supplementary information, Figure S2

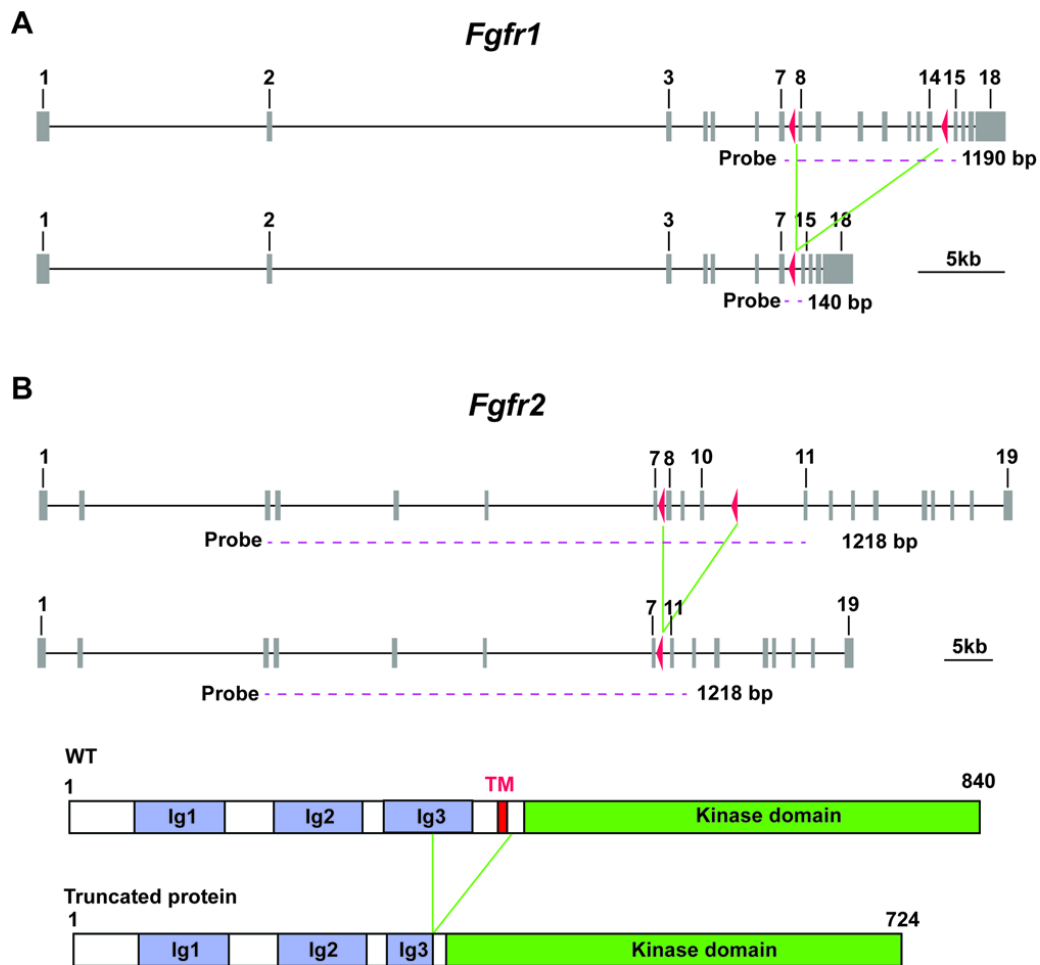

**Figure S2** The structure of Floxed *Fgfr1* and *Fgfr2* alleles. **(A)** Schematic representation of the genomic locus of *Fgfr1* before and after Cre-mediated deletion. Red arrowheads indicate the positions of the *LoxP* sites. The RNA *in situ* probe is composed of the sequences from exon 7-15, indicated by purple dashed lines. **(B)** Schematic representation of the genomic locus and the protein structure of *Fgfr2* before and after Cre-mediated deletion. The RNA *in situ* probe is composed of the sequences from exon 3-11, indicated by purple dashed lines.
