# Supplementary material
Source: PubMed Central journal article supplement (PMC3567820)
Supplement: cr2012150x3.pdf [file cr2012150x3.pdf]

Supplementary information, Figure S3

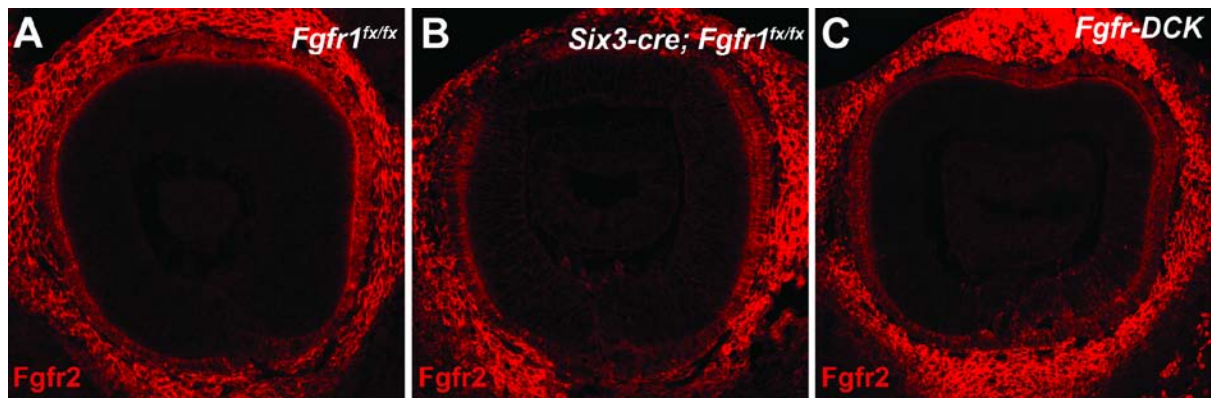

**Figure S3** The expression of *Fgfr2* protein is unchanged in *Fgfr1* single conditional knockout OCs. (A-C) Immunostaining results show that the protein is up-regulated in the OFM and TR regions of the *Fgfr-DCK* mutant OC (C), but remains unchanged in the *Fgfr1* single conditional knockout OC (B), when compared with the control OC (A).
