# Supplementary material
Source: PubMed Central journal article supplement (PMC3567820)
Supplement: cr2012150x4.pdf [file cr2012150x4.pdf]

Supplementary information, Figure S4

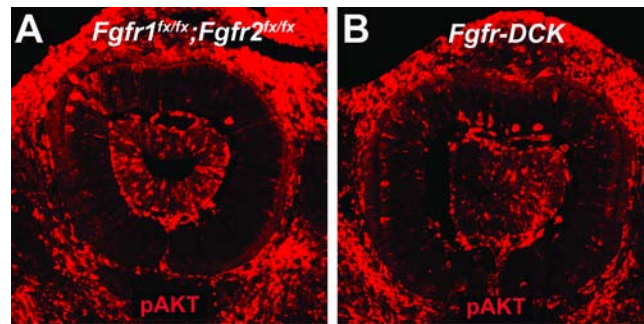

**Figure S4** AKT activity is not affected by defective FGF signaling. (A, B) E11.5 control and *Fgfr-DCK* mutant OCs, which are labeled for phosphorylated AKT (pAKT), show that pAKT exhibits similar low and mosaic expression in both the control and mutant OCs.
