# Supplementary material
Source: PubMed Central journal article supplement (PMC3567820)
Supplement: cr2012150x5.pdf [file cr2012150x5.pdf]

Supplementary information, Figure S5

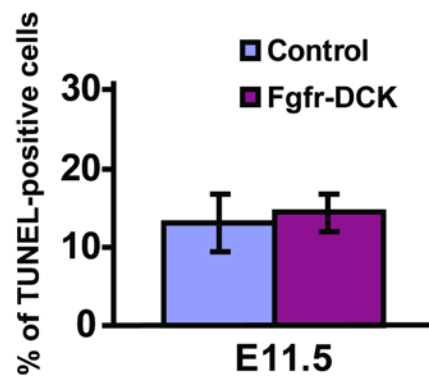

**Figure S5** FGF signaling is not required for the survival of OFM progenitors. Quantitative results show that there is no difference in the TUNEL<sup>+</sup> OFM progenitors between control and *Fgfr-DCK* mutant OCs.
