# Supplementary material
Source: PubMed Central journal article supplement (PMC3567820)
Supplement: cr2012150x6.pdf [file cr2012150x6.pdf]

Supplementary information, Figure S6

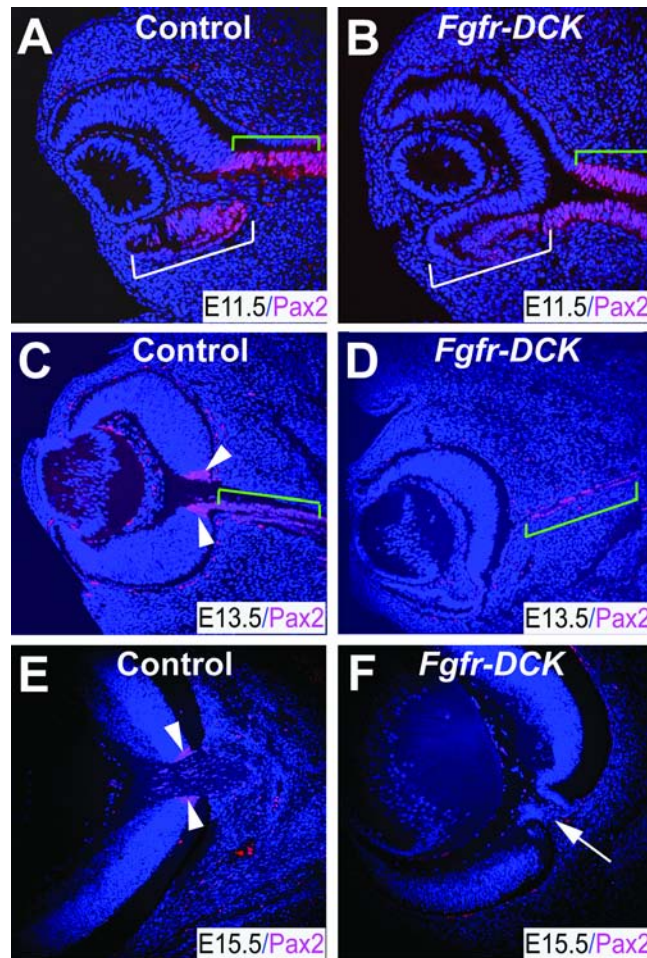

**Figure S6** Pax2<sup>+</sup> optic stalk progenitors gradually degenerate in *Fgfr-DCK* mutant eyes. (A, B) At E11.5, Pax2 is expressed in the optic stalk progenitors (green bracket) and ventral retinal progenitors (white bracket) of the control eye (A); it is dramatically down-regulated in the ventral retina (white bracket) of the *Fgfr-DCK* mutant eye, but remains highly expressed in the optic stalk (green bracket, B). (C, D) At E13.5, Pax2 is restricted in the optic stalk (green bracket, B). (C, D) At E13.5, Pax2 is restricted in the optic stalk (green bracket) and the optic disc (arrowheads); the *Fgfr-DCK* mutant eye lacks the Pax2<sup>+</sup> optic disc, and exhibits the shrinkage of the Pax2<sup>+</sup> optic stalk. (E, F) At E15.5, Pax2 is still expressed in the optic disc (arrowheads, E) and optic nerve astrocytes of the control eye; the *Fgfr-DCK* mutant eye has the unclosed fissure (arrow, F), but does not have the optic stalk anymore.
