# Supplementary material
Source: PubMed Central journal article supplement (PMC3567820)
Supplement: cr2012150x8.pdf [file cr2012150x8.pdf]

## Supplementary information, Table S1

| Gene title                                    | Gene symbol | Fold Change | p-value | Pea3 (M00655) binding sites                  | Ets (M00971) binding sites | Gene functions                                                                         |
|-----------------------------------------------|-------------|-------------|---------|----------------------------------------------|----------------------------|----------------------------------------------------------------------------------------|
| <b>Cell cycle regulators</b>                  |             |             |         |                                              |                            |                                                                                        |
| cyclin D2                                     | Ccnd2       | -8.3*       | 0.03    |                                              |                            | Cell cycle progression, G1/S transition                                                |
| cyclin D1                                     | Ccnd1       | -4.2        | 0.0003  | 575 (-)**                                    |                            | Cell cycle progression, G1/S transition                                                |
| myeloblastosis oncogene                       | Myb         | -4.0        | 0.0002  |                                              |                            | Regulation of G1-S progression                                                         |
| inner centromere protein                      | Incnp       | -3.0        | 0.01    | 2451 (+)<br>4788 (+)                         | 4788 (+)                   | Chromosome segregation, cytokinesis                                                    |
| abnormal spindle-like microcephaly associated | Aspm        | -2.9        | 0.02    |                                              |                            | Mitosis, forebrain neuroblast division                                                 |
| cell division cycle 25 homolog A              | Cdc25a      | -2.0        | 0.05    | 333 (-)<br>388 (-)<br>1794 (+)<br>3492 (+)   | 387 (-)                    | CDK phosphatase, cell cycle progression.                                               |
| cell division cycle associated 2              | Cdca2       | -2.0        | 0.05    | 4202 (-)                                     |                            | Mitosis                                                                                |
| SRY-box containing gene 2                     | Sox2        | -2.0        | 0.03    | 4049 (-)<br>4732 (+)                         | 4048 (-)                   | Proliferation of neural retinal cells                                                  |
| <b>Cytoskeleton regulators</b>                |             |             |         |                                              |                            |                                                                                        |
| coactosin-like 1                              | Cotl1       | -6.3        | 0.001   |                                              |                            | Actin binding, defense response to fungus                                              |
| enabled homologue                             | Enah        | -4.3        | 0.03    | 591 (-)<br>1829 (-)                          | 590 (-)                    | Actin filament organization, neural tube closure                                       |
| Wiskott-Aldrich syndrome-like                 | Wasl        | -2.8        | 0.04    | 2160 (-)<br>3520 (-)<br>3818 (+)<br>4055 (-) |                            | Regulator of cortical actin filament                                                   |
| coronin, actin binding protein 1C             | Coro1c      | -2.6        | 0.04    |                                              |                            | Remodeling of cortical actin cytoskeleton                                              |
| actin-binding LIM protein 1                   | Ablim1      | -2.2        | 0.03    | 2796 (+)                                     |                            | Cytoskeleton organization and axon guidance                                            |
| Ras homolog gene family, member A             | Rhoa        | -2.0        | 0.04    | 1882 (-)<br>2253 (+)                         | 1881 (-)<br>2253 (+)       | Actin cytoskeleton organization and biogenesis, cell morphogenesis, and cell adhesion. |

|                                                |       |      |             |                                                        |                                 |                                                      |
|------------------------------------------------|-------|------|-------------|--------------------------------------------------------|---------------------------------|------------------------------------------------------|
| palladin                                       | Palld | -2.1 | 0.04        | 5 (-)<br>366 (+)<br>2702 (-)<br>3885 (+)               |                                 | Actin cytoskeleton organization, neural tube closure |
| <b>Retinal cell fate determinants</b>          |       |      |             |                                                        |                                 |                                                      |
| paired box gene 6                              | Pax6  | +1.4 | 0.0000<br>6 | 760 (+)<br>858 (-)<br>1561 (+)<br>3315 (-)<br>4084 (-) | 760 (+)<br>1561 (+)<br>3314 (-) | Control of NR and RPE cell fates                     |
| visual system homeobox 2                       | Vsx2  | -4.0 | 0.0000<br>3 | 1654 (-)                                               |                                 | Control of the NR cell fate                          |
| microphthalmia-associated transcription factor | Mitf  | +1.9 | 0.0000<br>3 | 117 (-)                                                |                                 | Control of the RPE cell fate                         |
| ventral anterior homeobox-containing gene 1    | Vax1  | -2.4 | 0.0003      | 390 (+)<br>528 (+)<br>2485 (+)                         | 390 (+)                         | Control of the OF cell fate                          |

**Table S1** FGF signaling controls expression of the genes important for cell cycle progression, actin cytoskeleton dynamics and cell fate determination.

\*Negative numbers indicate fold changes for downregulation, whereas positive numbers denotes fold changes for upregulation.

\*\* (+) denotes the location of downstream to the transcription start site, whereas (-) denotes the location of upstream to the transcription start site.
